# Supplementary material
Source: PubMed Central journal article supplement (PMC4860081)
Supplement: NIHMS772116-supplement-7.pdf [file NIHMS772116-supplement-7.pdf]

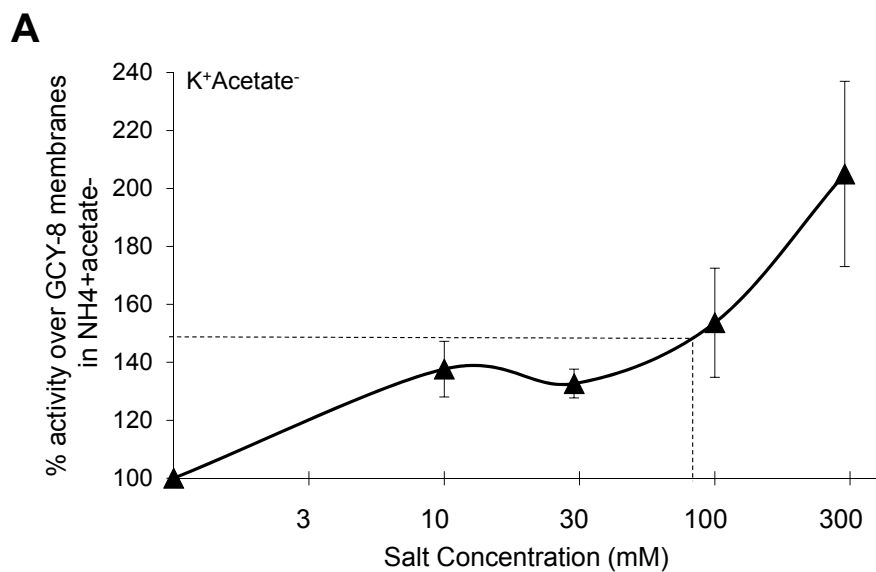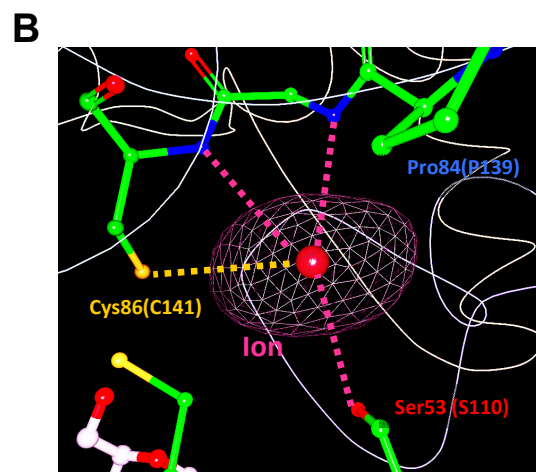

**C**

```

Rat NPR1  : SSENAAGVCSDT--AAPLAAVDLKWEHSPAVFLGPGC
Rat NPR2  : SSE-LDGACSEY--LAPLRAVDLKLYHDPDLLLGPGC
Rat NPR3  : DSD-----CGNRALFSLVDRVAAARGAKPDLILGPVC
Mouse NPR1 : SSENAAGVCSDT--AAPLAAVDLKWEHSPAVFLGPGC
Human NPR1 : SSENALGVCSDT--AAPLAAVDLKWEHNPAVFLGPGC
Worm GCY-8 : ISQTG---CGESYE-GVAVAADMYHLQVKAFIGPYC
Worm GCY-23: LNQMG---CGESYE-GVAVGADMYHVQGVRAFIGPYC
          * :                                : ::** *
    
```
