# Supplementary material
Source: PubMed Central journal article supplement (PMC4860081)

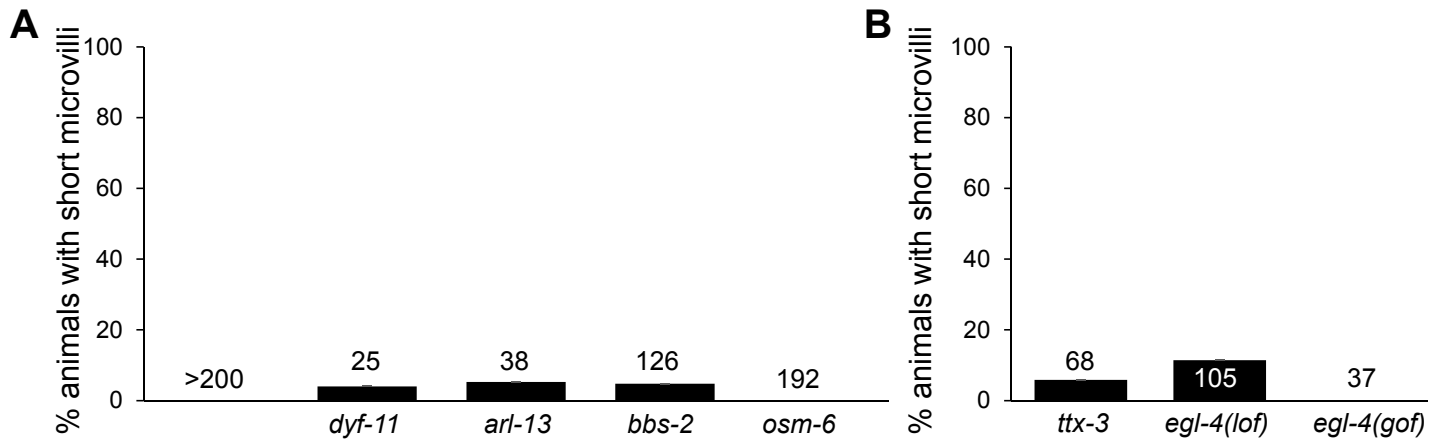

Supplement: NIHMS772116-supplement-3.pdf [file NIHMS772116-supplement-3.pdf]

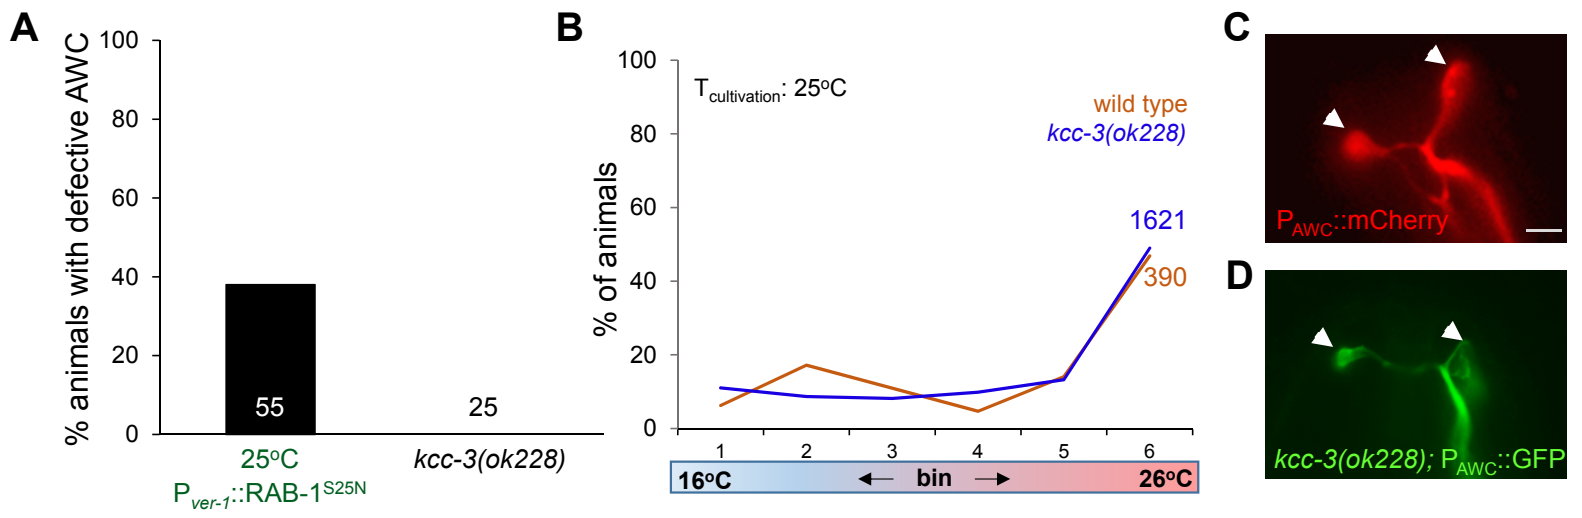

Supplement: NIHMS772116-supplement-4.pdf [file NIHMS772116-supplement-4.pdf]

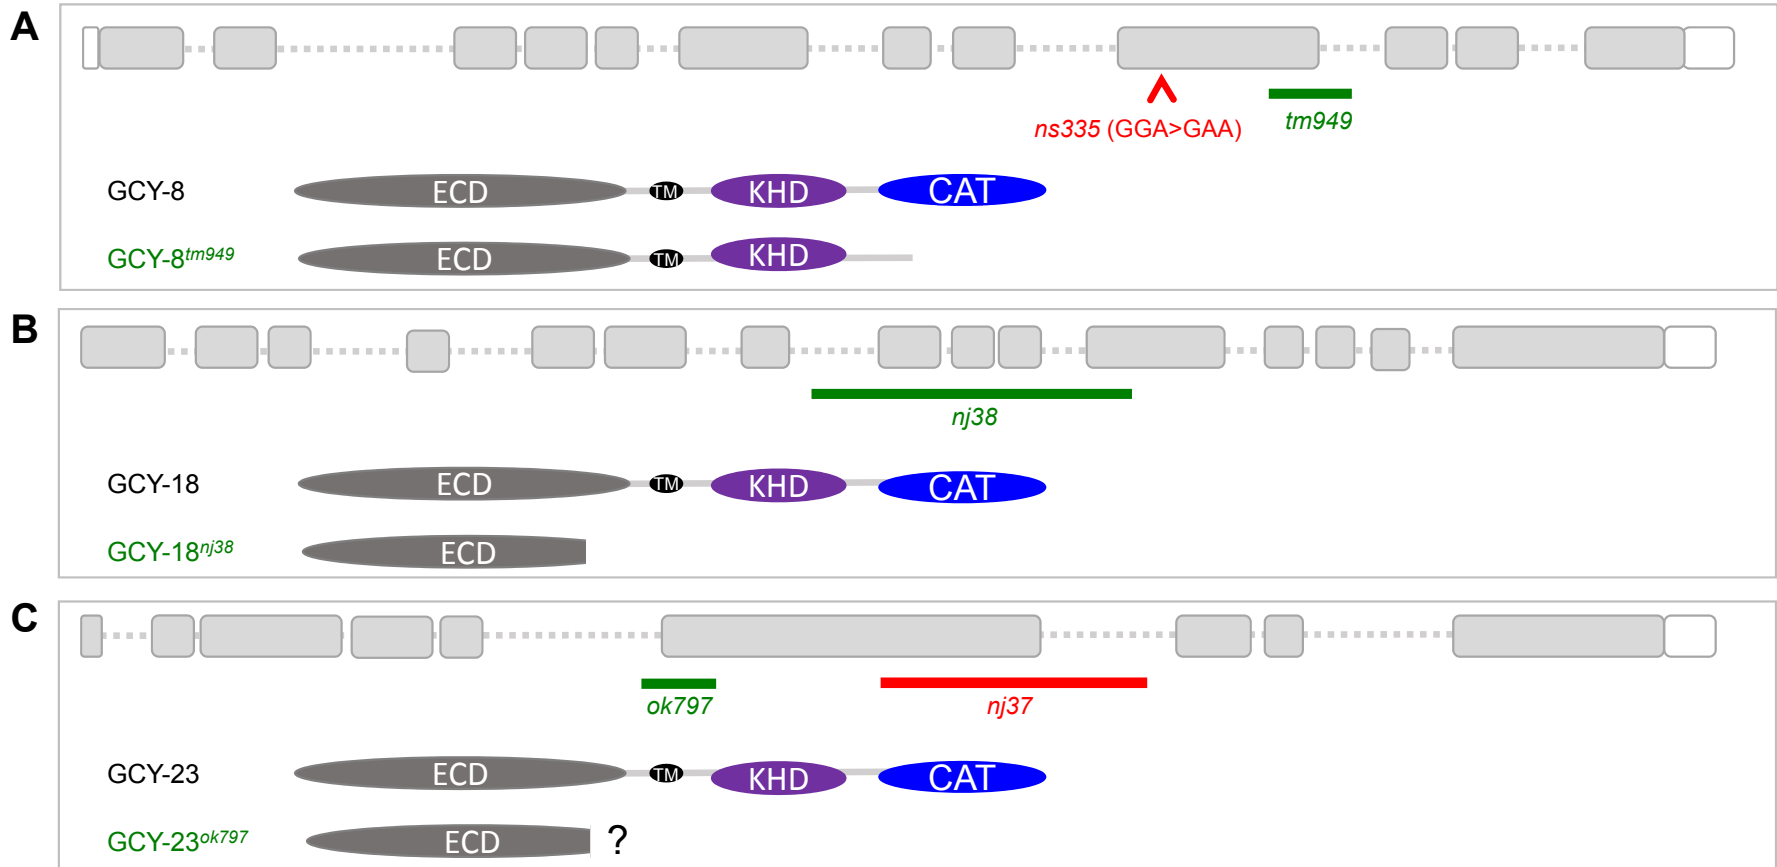

Supplement: NIHMS772116-supplement-5.pdf [file NIHMS772116-supplement-5.pdf]

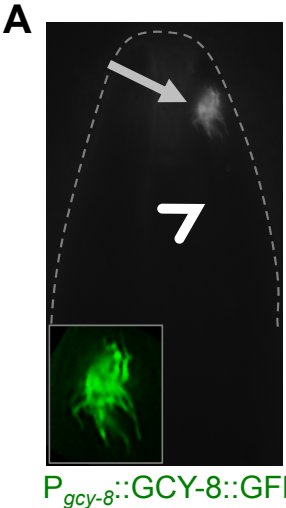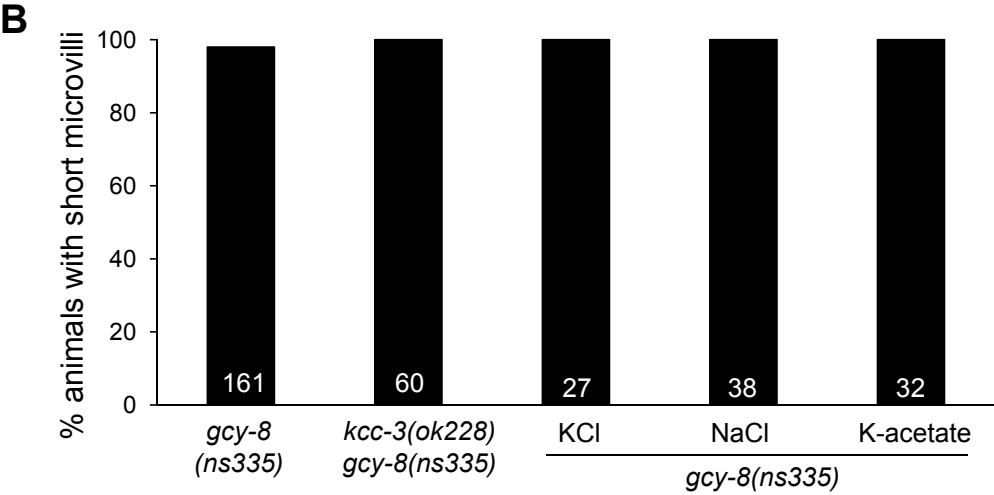

Supplement: NIHMS772116-supplement-6.pdf [file NIHMS772116-supplement-6.pdf]

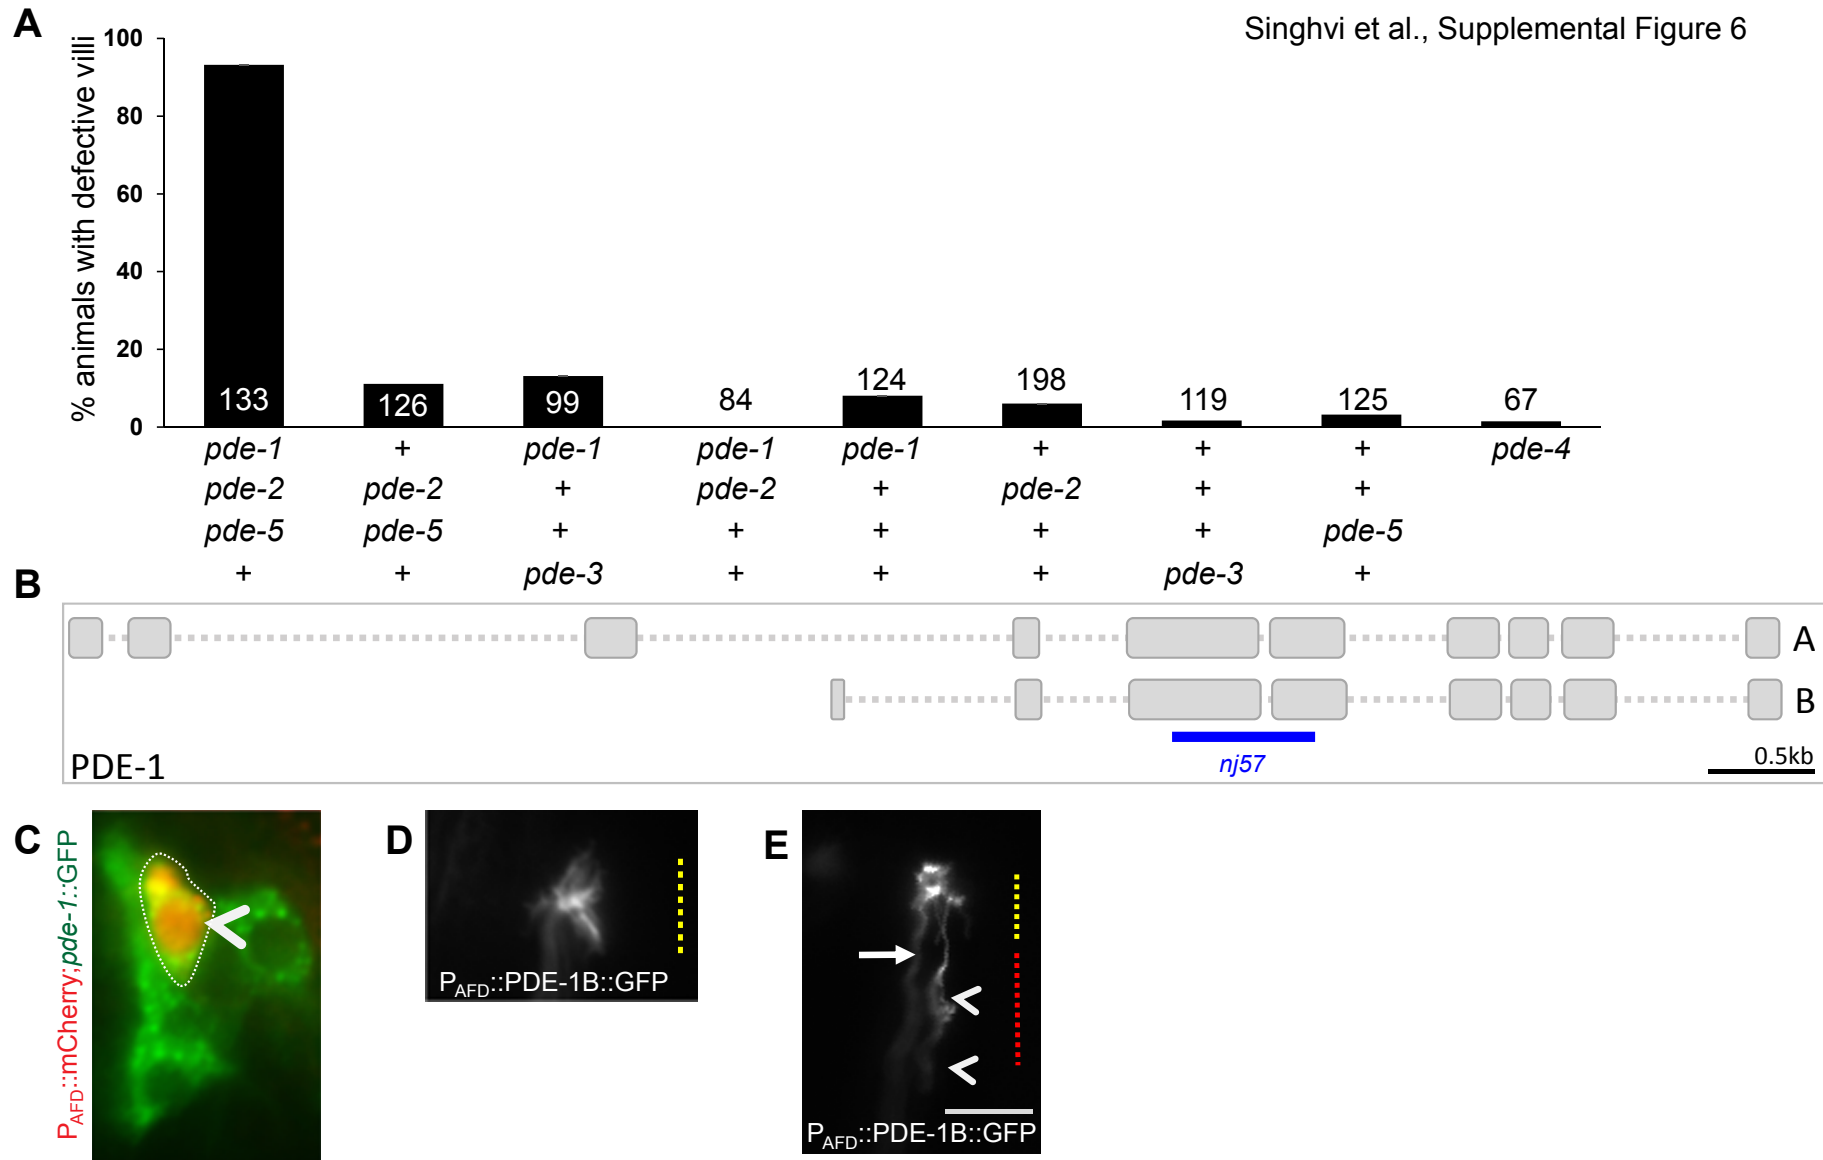

Supplement: NIHMS772116-supplement-8.pdf [file NIHMS772116-supplement-8.pdf]

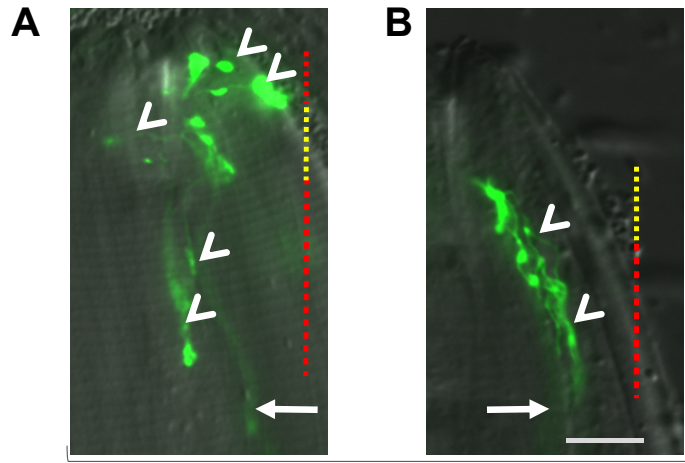

*P<sub>srtx-1</sub>::WSP-1A::SL2::GFP*

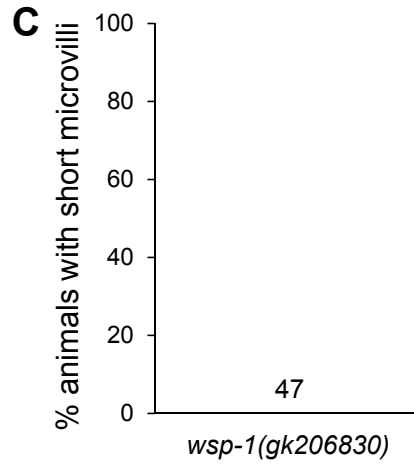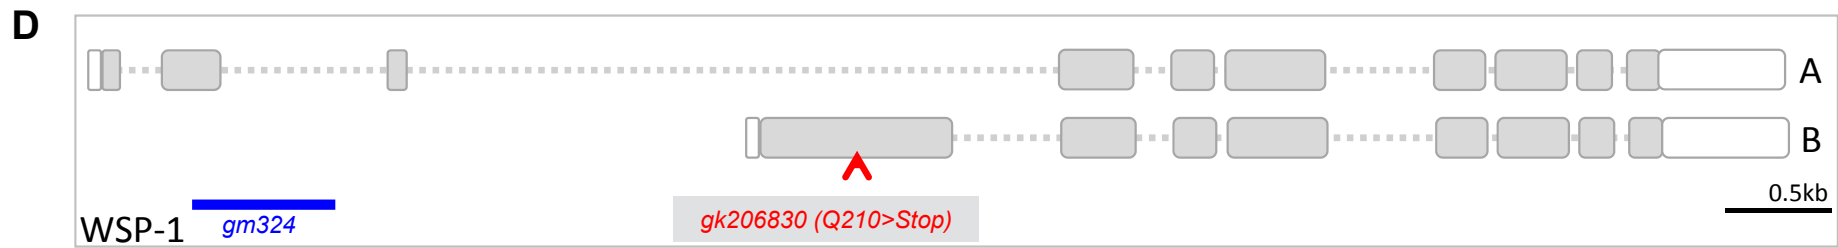

Supplement: NIHMS772116-supplement-9.pdf [file NIHMS772116-supplement-9.pdf]
